# Supplementary material for: Porcine Circovirus (PCV) Genotype 2d-Based Virus-like Particles (VLPs) Induced Broad Cross-Neutralizing Antibodies against Diverse Genotypes and Provided Protection in Dual-Challenge Infection of a PCV2d Virus and a Type 1 Porcine Reproductive and Respiratory Syndrome Virus (PRRSV)
Source: MDPI journal article supplement (doi:10.3390/pathogens10091145), 2021-09-06

## Supplementary Materials

Figure S1. Macroscopic observation of lung lesions.

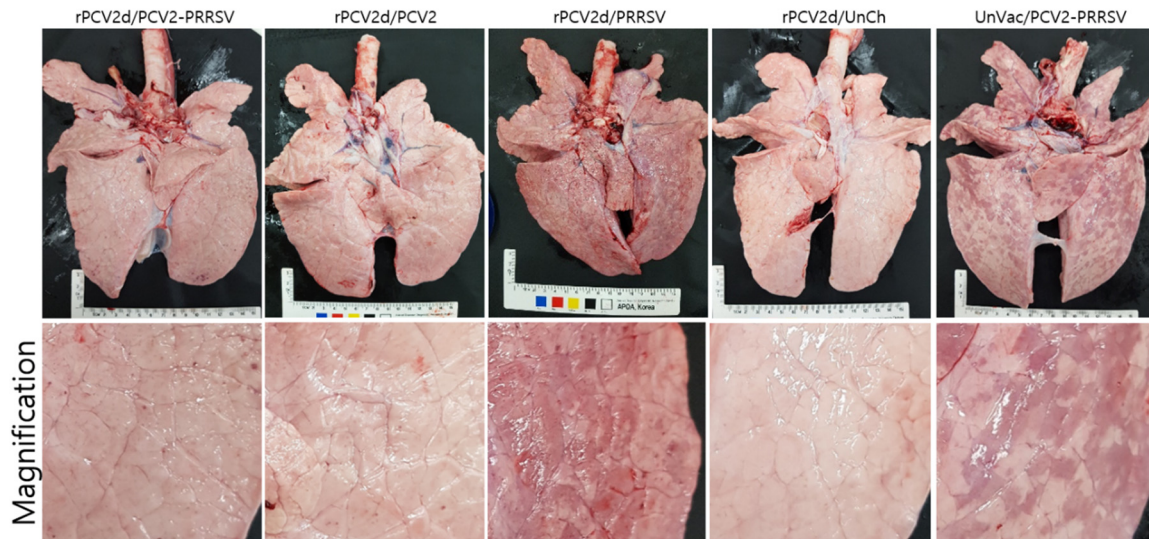

Figure S2. Microscopic observation of lesions in lung, tonsil, mesenteric and inguinal LN.

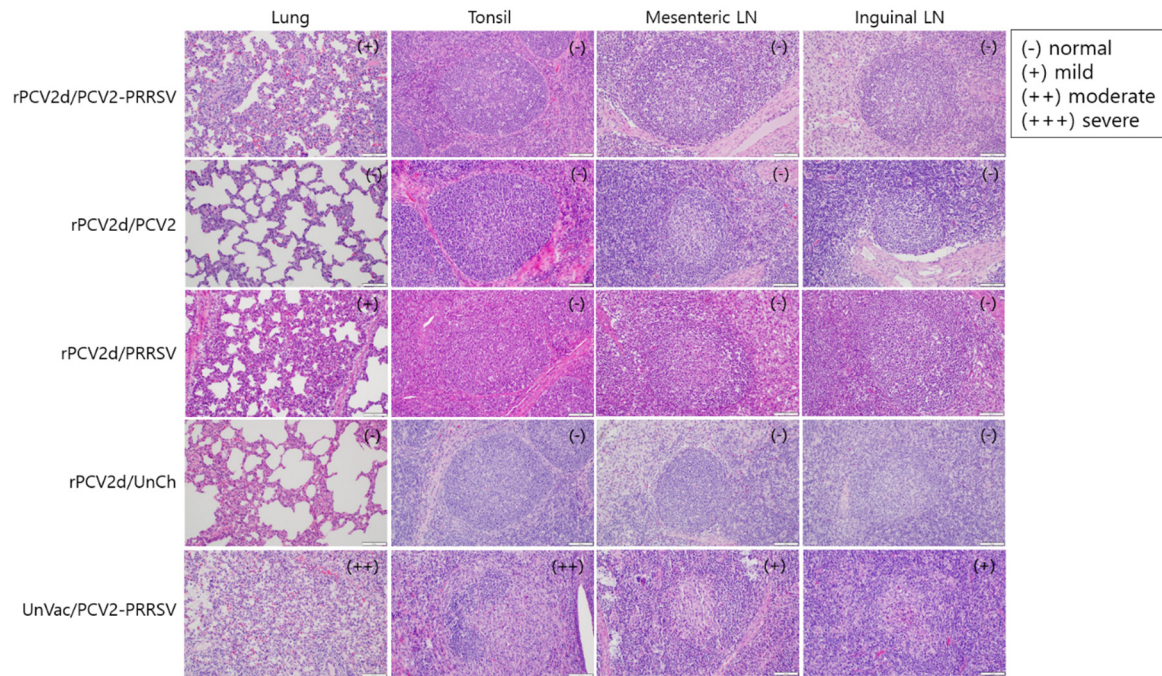

Supplement: s1 [file s1]
